# Supplementary material for: Identifying Adaptation Options and Constraints: The Role of Agronomist Knowledge in Catchment Management Strategy
Source: Springer Nature journal article supplement (doi:10.1007/s11269-013-0498-6), 2014-01-01

# Identifying Adaptation Options and Constraints: The role of agronomist knowledge in catchment management strategy Water Resources Management

Tom Dolan, David J. Parsons\*, Peter Howsam, Mick J. Whelan, Liz Varga

\* Corresponding Author: David J. Parsons, School of Applied Sciences, Cranfield University, email: [d.parsons@cranfield.ac.uk](mailto:d.parsons@cranfield.ac.uk)

**Online resource 1. Map of England and Wales showing the approximate extent of the study area (in red).**

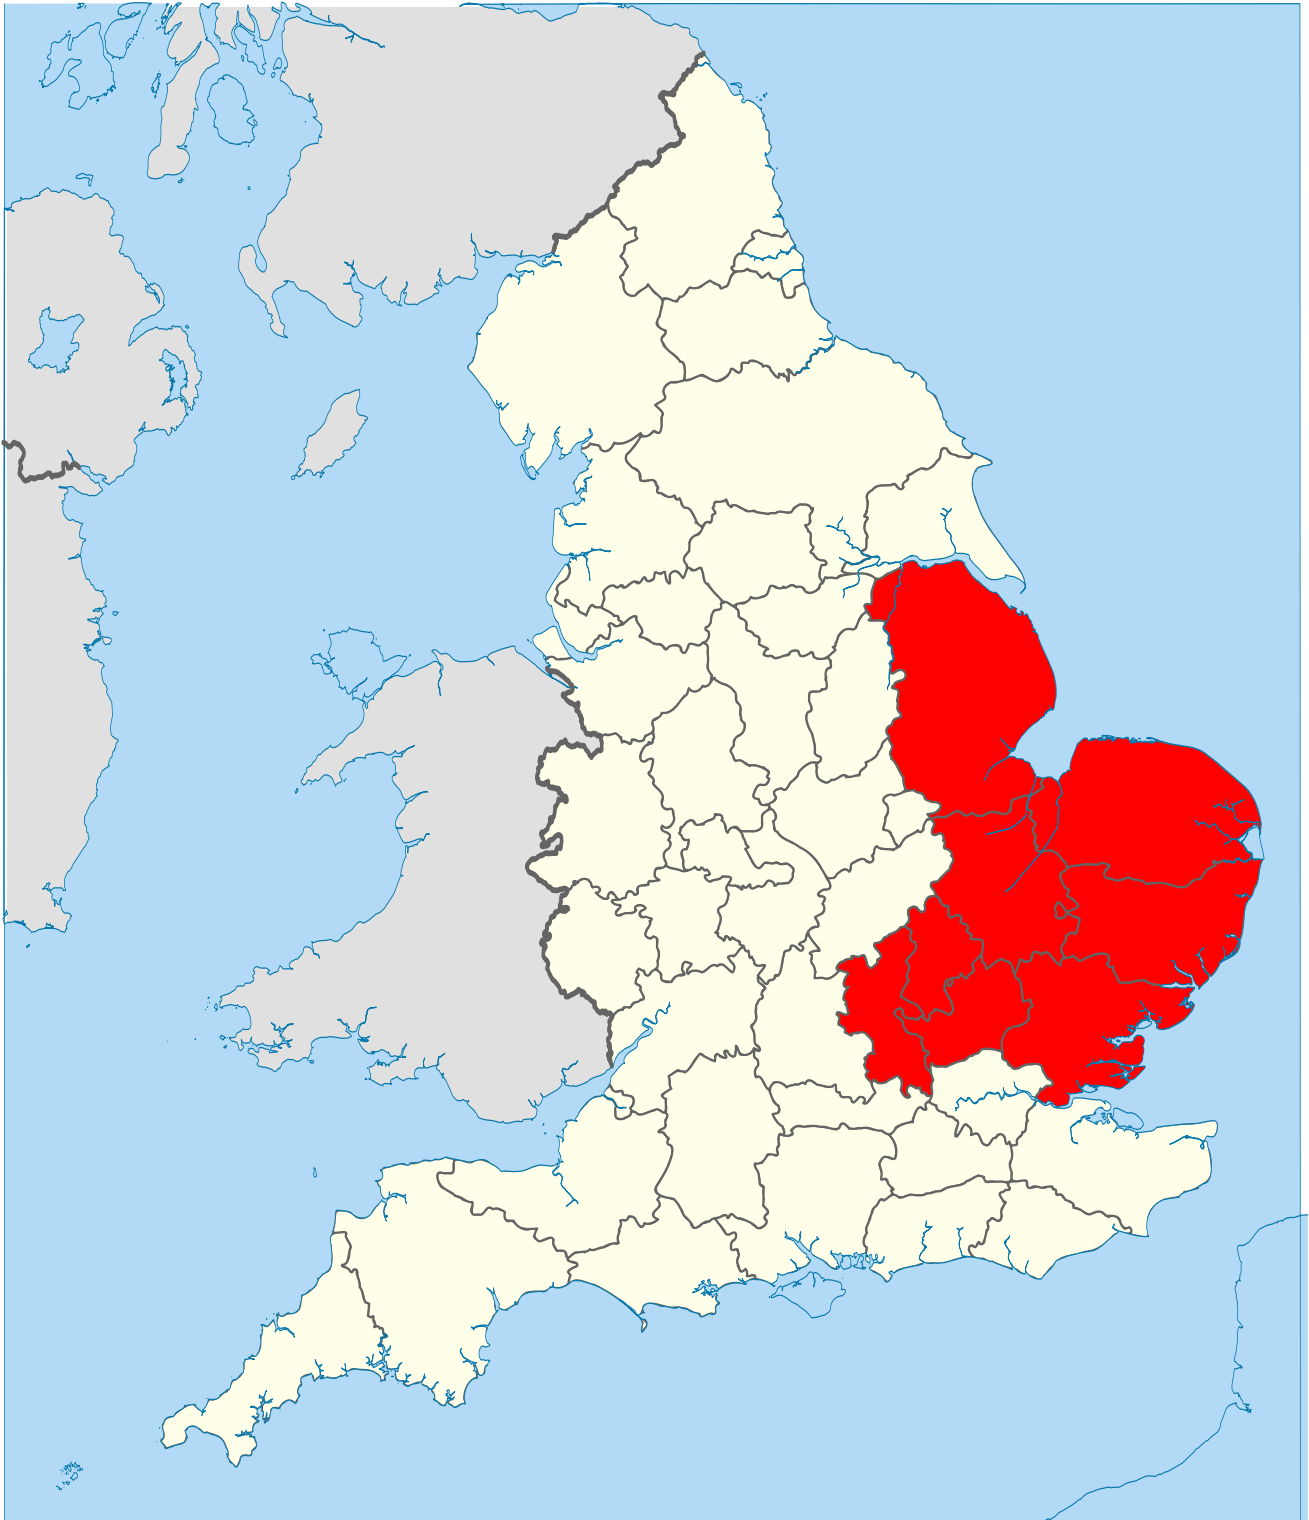

Supplement: MOESM1 [file 11774432]
