# Supplementary material for: Identifying Adaptation Options and Constraints: The Role of Agronomist Knowledge in Catchment Management Strategy
Source: Springer Nature journal article supplement (doi:10.1007/s11269-013-0498-6), 2014-01-01
Supplement: MOESM4 [file 11774432]

# **Identifying Adaptation Options and Constraints: The role of agronomist knowledge in catchment management strategy**

## **Water Resources Management**

Tom Dolan, David J. Parsons\*, Peter Howsam, Mick J. Whelan, Liz Varga

\* Corresponding Author: David J. Parsons, School of Applied Sciences, Cranfield University, email: d.parsons@cranfield.ac.uk

## **Online Resource 3. Results from Stage 3 online survey**

This document presents results from the 43 Likert items included in the Stage 3 survey for online consultation with pesticide agronomists (Tables 1–7), and the results from three acquiescence bias tests and two internal consistency tests performed to validate responses to the online consultation with pesticide agronomists (Table 8), as described in Section 2.4

Tables 1–7 each include a count distribution of responses against the Likert response scale (‘Strongly disagree’ (SD), ‘Disagree’ (D), ‘Neither agree nor disagree’ (N), ‘Agree’ (A), ‘Strongly agree’ (SA)), a p-value from chi-squared ‘goodness of fit’ tests, and a conclusion at significance level ( $\alpha$ ) = 0.05 regarding whether to accept or reject  $H_0$  (i.e. that there is no consensus in response to the Likert item).

|                                                                                                                                                               |    |
|---------------------------------------------------------------------------------------------------------------------------------------------------------------|----|
| Table 1. Likert items for propyzamide and carbetamide .....                                                                                                   | 2  |
| Table 2. Likert items for metaldehyde .....                                                                                                                   | 3  |
| Table 3. Likert items for mesosulfuron-methyl (Atlantis).....                                                                                                 | 4  |
| Table 4. Likert items for clopyralid .....                                                                                                                    | 5  |
| Table 5. Likert items for pendimethalin .....                                                                                                                 | 6  |
| Table 6. Likert items for chlortoluron.....                                                                                                                   | 7  |
| Table 7. Likert items for general trends .....                                                                                                                | 8  |
| Table 8. Spearman’s rank correlation coefficient ( $\rho$ ) tests for acquiescence bias and internal consistency using Spearman’s rank correlation test ..... | 10 |

**Table 1. Likert items for propyzamide and carbetamide**

| Item #    | Likert Item                                                                                                                                      | Distribution (count) (n=94) |                   |         |       |                | p-value | Conclusion<br>(Accept Null Hypothesis H <sub>0</sub> or alternative hypothesis H <sub>a</sub> ) |
|-----------|--------------------------------------------------------------------------------------------------------------------------------------------------|-----------------------------|-------------------|---------|-------|----------------|---------|-------------------------------------------------------------------------------------------------|
|           |                                                                                                                                                  | Disagree                    | Strongly Disagree | Neither | Agree | Strongly Agree |         |                                                                                                 |
| <b>1a</b> | If propyzamide is not available, carbetamide can be used to manage resistant blackgrass in the OSR stage of a combinable rotation                | 13                          | 26                | 14      | 34    | 7              | 0.823   | Accept H <sub>0</sub> :<br><u>No consensus</u>                                                  |
| <b>1b</b> | There are no pesticide alternatives to propyzamide and carbetamide for resistant blackgrass management in the OSR stage of a combinable rotation | 2                           | 5                 | 8       | 27    | 51             | 0.000   | Accept H <sub>a</sub> :<br><u>Agree</u>                                                         |
| <b>1c</b> | If propyzamide and carbetamide were banned OSR would continue to be grown in areas where resistant blackgrass is a problem                       | 22                          | 40                | 12      | 15    | 3              | 0.000   | Accept H <sub>a</sub> :<br><u>Disagree</u>                                                      |
| <b>1d</b> | Without propyzamide and carbetamide, no autumn break crops can be grown where resistant blackgrass is a problem                                  | 0                           | 19                | 11      | 40    | 22             | 0.000   | Accept H <sub>a</sub> :<br><u>Agree</u>                                                         |
| <b>1e</b> | Without propyzamide and carbetamide, a change to the rotation would be needed where resistant blackgrass is a problem                            | 0                           | 1                 | 4       | 42    | 43             | 0.000   | Accept H <sub>a</sub> :<br><u>Agree.</u>                                                        |
| <b>1f</b> | The loss of propyzamide and carbetamide will lead to increased use of spring crops to manage resistant blackgrass in the rotation                | 2                           | 5                 | 15      | 48    | 22             | 0.000   | Accept H <sub>a</sub> :<br><u>Agree</u>                                                         |

**Table 2. Likert items for metaldehyde**

| Item # | Likert Item                                                                                                 | Distribution (count) (n=94) |                   |         |       |                | p-value | Conclusion<br>(Accept Null Hypothesis H <sub>0</sub> or alternative hypothesis H <sub>a</sub> ) |
|--------|-------------------------------------------------------------------------------------------------------------|-----------------------------|-------------------|---------|-------|----------------|---------|-------------------------------------------------------------------------------------------------|
|        |                                                                                                             | Disagree                    | Strongly Disagree | Neither | Agree | Strongly Agree |         |                                                                                                 |
| 2a     | If you couldn't use metaldehyde, methiocarb could be used for slug management                               | 1                           | 5                 | 6       | 65    | 15             | 0.000   | Accept H <sub>a</sub> :<br><u>Agree.</u>                                                        |
| 2b     | If you couldn't use metaldehyde, ferric phosphate could be used for slug management                         | 1                           | 5                 | 11      | 61    | 14             | 0.000   | Accept H <sub>a</sub> :<br><u>Agree.</u>                                                        |
| 2c     | There are no pesticide alternatives to metaldehyde                                                          | 23                          | 54                | 6       | 6     | 1              | 0.000   | Accept H <sub>a</sub> :<br><u>Disagree.</u>                                                     |
| 2d     | Cultural control is not a substitute for metaldehyde slug control                                           | 0                           | 14                | 18      | 41    | 15             | 0.000   | Accept H <sub>a</sub> :<br><u>Agree.</u>                                                        |
| 2e     | In the absence of metaldehyde, pesticide substitutes of equal efficacy are available                        | 0                           | 18                | 13      | 48    | 11             | 0.000   | Accept H <sub>a</sub> :<br><u>Agree.</u>                                                        |
| 2f     | The loss of metaldehyde would lead to a change to the rotation where OSR and Wheat are grown on heavy soils | 5                           | 36                | 28      | 20    | 3              | 0.024   | Accept H <sub>a</sub> :<br><u>Disagree.</u>                                                     |

**Table 3. Likert items for mesosulfuron-methyl (Atlantis)**

| Item # | Likert Item                                                                                                                            | Distribution (count) (n=94) |                   |         |       |                | p-value | Conclusion<br>(Accept Null Hypothesis H <sub>0</sub> or alternative hypothesis H <sub>a</sub> ) |
|--------|----------------------------------------------------------------------------------------------------------------------------------------|-----------------------------|-------------------|---------|-------|----------------|---------|-------------------------------------------------------------------------------------------------|
|        |                                                                                                                                        | Disagree                    | Strongly Disagree | Neither | Agree | Strongly Agree |         |                                                                                                 |
| 3a     | There are no pesticide alternatives to Atlantis for blackgrass management at the post-emergence stage in wheat                         | 4                           | 39                | 9       | 29    | 12             | 0.827   | Accept H <sub>0</sub> :<br><u>No consensus</u>                                                  |
| 3b     | Where the efficacy of Atlantis is reduced, there will be an increase in the use of residual chemistry at pre-emergence timing in wheat | 0                           | 4                 | 6       | 40    | 43             | 0.000   | Accept H <sub>a</sub> :<br><u>Agree.</u>                                                        |
| 3c     | Cultural control can replace the loss of Atlantis                                                                                      | 16                          | 49                | 14      | 12    | 2              | 0.000   | Accept H <sub>a</sub> :<br><u>Disagree.</u>                                                     |
| 3d     | In high pressure resistant blackgrass areas, a reduction in the efficacy of Atlantis will reduce wheat yields                          | 1                           | 1                 | 9       | 46    | 36             | 0.000   | Accept H <sub>a</sub> :<br><u>Agree.</u>                                                        |
| 3e     | In high pressure resistant blackgrass areas, a reduction in the efficacy of Atlantis will prompt a change to the rotation              | 1                           | 15                | 16      | 49    | 12             | 0.000   | Accept H <sub>a</sub> :<br><u>Agree.</u>                                                        |

**Table 4. Likert items for clopyralid**

| Item # | Likert Item                                                                             | Distribution (count) (n=94) |                   |         |       |                | p-value | Conclusion<br>(Accept Null Hypothesis H <sub>0</sub> or alternative hypothesis H <sub>a</sub> ) |
|--------|-----------------------------------------------------------------------------------------|-----------------------------|-------------------|---------|-------|----------------|---------|-------------------------------------------------------------------------------------------------|
|        |                                                                                         | Disagree                    | Strongly Disagree | Neither | Agree | Strongly Agree |         |                                                                                                 |
| 4a     | Clopyralid is the only available pesticide for thistle management in OSR                | 0                           | 14                | 12      | 53    | 14             | 0.000   | Accept H <sub>a</sub> :<br><u>Agree.</u>                                                        |
| 4b     | There are available pesticide alternatives to replace clopyralid for thistle management | 8                           | 48                | 20      | 18    | 0              | 0.000   | Accept H <sub>a</sub> :<br><u>Disagree.</u>                                                     |
| 4c     | Cultural control interventions can substitute for clopyralid control of thistles in OSR | 17                          | 55                | 16      | 4     | 2              | 0.000   | Accept H <sub>a</sub> :<br><u>Disagree.</u>                                                     |
| 4d     | In the absence of clopyralid, thistles will reduce OSR yields                           | 0                           | 11                | 24      | 49    | 10             | 0.000   | Accept H <sub>a</sub> :<br><u>Agree.</u>                                                        |
| 4e     | In the absence of clopyralid, thistles can be managed without a change to the rotation  | 6                           | 44                | 25      | 18    | 1              | 0.000   | Accept H <sub>a</sub> :<br><u>Disagree.</u>                                                     |

**Table 5. Likert items for pendimethalin**

| Item # | Likert Item                                                                                                                               | Distribution (count) (n=94) |                   |         |       |                | p-value | Conclusion<br>(Accept Null Hypothesis H <sub>0</sub> or alternative hypothesis H <sub>a</sub> ) |
|--------|-------------------------------------------------------------------------------------------------------------------------------------------|-----------------------------|-------------------|---------|-------|----------------|---------|-------------------------------------------------------------------------------------------------|
|        |                                                                                                                                           | Disagree                    | Strongly Disagree | Neither | Agree | Strongly Agree |         |                                                                                                 |
| 5a     | The loss of pendimethalin will lead to increased stacking of other pre-emergence residual herbicides to manage grassweeds in cereal crops | 0                           | 1                 | 9       | 45    | 39             | 0.000   | Accept H <sub>a</sub> : <u>Agree.</u>                                                           |
| 5b     | If pendimethalin were the only active substance lost, it would be possible to maintain cereal yields using alternative herbicides         | 5                           | 13                | 18      | 52    | 6              | 0.000   | Accept H <sub>a</sub> : <u>Agree.</u>                                                           |
| 5c     | Pendimethalin is one of many modes of action used as part of a resistance management strategy for Blackgrass                              | 0                           | 1                 | 4       | 52    | 37             | 0.000   | Accept H <sub>a</sub> : <u>Agree.</u>                                                           |
| 5d     | The loss of pendimethalin would trigger a change to the combinable rotation                                                               | 9                           | 33                | 34      | 15    | 3              | 0.002   | Accept H <sub>a</sub> : <u>Disagree.</u>                                                        |

**Table 6. Likert items for chlortoluron**

| Item # | Likert Item                                                                                                                                          | Distribution (count) (n=94) |                   |         |       |                | p-value | Conclusion<br>(Accept Null Hypothesis H <sub>0</sub> or alternative hypothesis H <sub>a</sub> ) |
|--------|------------------------------------------------------------------------------------------------------------------------------------------------------|-----------------------------|-------------------|---------|-------|----------------|---------|-------------------------------------------------------------------------------------------------|
|        |                                                                                                                                                      | Disagree                    | Strongly Disagree | Neither | Agree | Strongly Agree |         |                                                                                                 |
| 6a     | The loss of chlortoluron will lead to increased use of other herbicides at the pre-emergence stage for blackgrass control in the combinable rotation | 3                           | 7                 | 10      | 60    | 13             | 0.000   | Accept H <sub>a</sub> : <u>Agree.</u>                                                           |
| 6b     | If chlortoluron were the only active substance lost, it would be possible to maintain cereal yields using alternative herbicides                     | 3                           | 5                 | 17      | 60    | 8              | 0.000   | Accept H <sub>a</sub> : <u>Agree.</u>                                                           |
| 6c     | Chlortoluron is one of many modes of action used as part of a resistance management strategy for Blackgrass                                          | 1                           | 1                 | 12      | 56    | 23             | 0.000   | Accept H <sub>a</sub> : <u>Agree.</u>                                                           |

**Table 7. Likert items for general trends**

| Item # | Likert Item                                                                                                                              | Distribution (count) (n=94) |          |         |       |                | p-value | Conclusion<br>(Accept Null Hypothesis H <sub>0</sub> or alternative hypothesis H <sub>a</sub> ) |
|--------|------------------------------------------------------------------------------------------------------------------------------------------|-----------------------------|----------|---------|-------|----------------|---------|-------------------------------------------------------------------------------------------------|
|        |                                                                                                                                          | Strongly Disagree           | Disagree | Neither | Agree | Strongly Agree |         |                                                                                                 |
| GS1a   | No new herbicides for blackgrass will be available in the next 5 years                                                                   | 2                           | 7        | 10      | 40    | 34             | 0.000   | Accept H <sub>a</sub> :<br><u>Agree.</u>                                                        |
| GS1b   | When one active substance is lost (for whatever reason) other active substance(s) will be used to manage the weed, pest or disease issue | 1                           | 9        | 9       | 56    | 18             | 0.000   | Accept H <sub>a</sub> :<br><u>Agree.</u>                                                        |
| GS1c   | In the absence of effective pesticide control, weed and pest pressures will increase over time                                           | 0                           | 1        | 2       | 39    | 50             | 0.000   | Accept H <sub>a</sub> :<br><u>Agree.</u>                                                        |
| GS1d   | The agronomic impact of losing an active substance depends upon what active substances remain available                                  | 0                           | 1        | 1       | 52    | 38             | 0.000   | Accept H <sub>a</sub> :<br><u>Agree.</u>                                                        |
| GS1e   | Cultural control is a complement to, not a direct substitute for pesticides                                                              | 0                           | 0        | 2       | 38    | 52             | 0.000   | Accept H <sub>a</sub> :<br><u>Agree.</u>                                                        |
| GS1f   | Effective resistance management requires as many different modes of action as possible                                                   | 0                           | 0        | 1       | 22    | 69             | 0.000   | Accept H <sub>a</sub> :<br><u>Agree.</u>                                                        |
| GS1g   | When an active substance is lost, alternative active substances will be tried in preference to non pesticide interventions               | 0                           | 7        | 14      | 52    | 18             | 0.000   | Accept H <sub>a</sub> :<br><u>Agree.</u>                                                        |
| GS2a   | Where alternative pesticides cannot prevent severe gross margin losses, spring cropping will increase                                    | 1                           | 5        | 13      | 64    | 9              | 0.000   | Accept H <sub>a</sub> :<br><u>Agree.</u>                                                        |
| GS2b   | A change to the rotation is the intervention of last resort                                                                              | 3                           | 17       | 8       | 49    | 15             | 0.000   | Accept H <sub>a</sub> :<br><u>Agree.</u>                                                        |
| GS2c   | In general, direct substitutes do not exist for any active substance                                                                     | 1                           | 15       | 14      | 51    | 10             | 0.000   | Accept H <sub>a</sub> :<br><u>Agree.</u>                                                        |



|             |                                                                                                                                                     |    |    |    |    |    |       |                                             |
|-------------|-----------------------------------------------------------------------------------------------------------------------------------------------------|----|----|----|----|----|-------|---------------------------------------------|
| <b>GS2d</b> | If the withdrawal of an active substance is announced 5 years in advance, alternative active substances will be available by the time of withdrawal | 24 | 38 | 19 | 10 | 2  | 0.000 | Accept Ha:<br><u>Disagree.</u>              |
| <b>GS2e</b> | The adoption of wide OSR rows and inter row spraying will reduce current dependency on propyzamide and carbetamide                                  | 9  | 25 | 36 | 21 | 2  | 0.145 | Accept Hn:<br><u>No</u><br><u>consensus</u> |
| <b>GS2f</b> | If approved for use, RoundUp Ready OSR would reduce current dependency on propyzamide and carbetamide                                               | 4  | 2  | 14 | 47 | 26 | 0.000 | Accept Ha:<br><u>Agree.</u>                 |
| <b>GS2g</b> | If the future of one active substance is uncertain, alternative active substances will come to the market                                           | 17 | 47 | 17 | 11 | 0  | 0.000 | Accept Ha:<br><u>Disagree.</u>              |

**Table 8. Spearman's rank correlation coefficient ( $\rho$ ) tests for acquiescence bias and internal consistency using Spearman's rank correlation test**

| Test                 | Test pair    | $\rho$ | Conclusion        |
|----------------------|--------------|--------|-------------------|
| Acquiescence bias    | 4a + 4b      | 0.548  | Accept $H_n^{**}$ |
| Acquiescence bias    | 1c + 1e      | 0.333  | Accept $H_n^{**}$ |
| Acquiescence bias    | 2e + 2c      | 0.589  | Accept $H_n^{**}$ |
| Internal consistency | 3d + 3e      | 0.245  | Accept $H_n^*$    |
| Internal consistency | GS12d + GS2g | 0.63   | Accept $H_n^{**}$ |

\* Accept at significance level ( $\alpha$ ) = 0.05, \*\* Accept at  $\alpha = 0.05$  and  $\alpha = 0.01$
